# Supplementary material for: A magnetite reference material for in situ Fe isotope analysis
Source: Royal Society of Chemistry journal article supplement (doi:10.1039/d3ja00457k), 2024-01-01
Supplement: d3ja00457k1.xlsx [file d3ja00457k1.xlsx]

## Sheet: Table S1
Table S1 Full EPMA results (in wt%) of MtFe-1
No.	FeO	MnO	ZnO	CuO	CoO	TiO2	Cr2O3	SiO2	Al2O3	Na2O	MgO	K2O	P2O5	CaO	NiO	Total
Detection limit	0.018	0.019	0.021	0.018	0.022	0.037	0.036	0.058	0.037	0.027	0.025	0.008	0.039	0.013	0.018
1	86.497	0.126	0.03	BDL	BDL	BDL	BDL	2.261	0.256	BDL	0.644	BDL	BDL	0.358	0.038	90.21
2	86.818	0.047	BDL	BDL	BDL	BDL	BDL	2.301	0.293	BDL	0.615	BDL	BDL	0.131	BDL	90.205
3	85.861	0.089	BDL	BDL	BDL	BDL	BDL	2.354	0.205	BDL	0.735	0.023	BDL	0.288	0.02	89.575
4	86.14	0.086	BDL	BDL	BDL	BDL	BDL	2.427	0.218	BDL	0.728	BDL	BDL	0.223	BDL	89.822
5	86.413	0.046	BDL	BDL	BDL	BDL	BDL	2.333	0.334	BDL	0.616	0.009	BDL	0.157	0.021	89.929
6	86.219	0.097	BDL	0.018	BDL	0.105	BDL	2.367	0.306	BDL	0.602	BDL	BDL	0.22	BDL	89.934
7	86.535	0.06	BDL	BDL	BDL	0.046	BDL	2.419	0.329	BDL	0.678	0.009	BDL	0.149	BDL	90.225
8	86.42	0.052	BDL	BDL	BDL	BDL	BDL	2.233	0.223	BDL	0.612	BDL	BDL	0.137	BDL	89.677
9	86.848	0.095	BDL	BDL	BDL	BDL	BDL	2.224	0.188	BDL	0.732	BDL	BDL	0.227	BDL	90.314
10	86.302	0.074	BDL	0.027	BDL	0.054	BDL	2.396	0.204	BDL	0.636	0.012	BDL	0.226	BDL	89.931
11	86.718	0.077	BDL	BDL	BDL	BDL	BDL	2.351	0.331	BDL	0.663	BDL	BDL	0.215	BDL	90.355
12	85.947	0.083	BDL	BDL	BDL	0.084	BDL	2.246	0.27	0.049	0.674	BDL	BDL	0.309	BDL	89.662
13	86.378	0.089	BDL	BDL	BDL	BDL	BDL	2.437	0.226	BDL	0.627	BDL	BDL	0.221	0.03	90.008
14	86.973	0.1	BDL	BDL	BDL	BDL	BDL	2.353	0.252	BDL	0.692	0.02	BDL	0.108	BDL	90.498
15	86.421	0.071	BDL	BDL	BDL	0.06	BDL	2.338	0.309	BDL	0.589	BDL	0.039	0.139	BDL	89.966
16	86.372	0.057	BDL	0.035	BDL	BDL	BDL	2.425	0.261	BDL	0.55	BDL	BDL	0.12	BDL	89.82
17	86.582	0.058	BDL	BDL	BDL	BDL	BDL	2.296	0.244	BDL	0.648	0.013	BDL	0.195	BDL	90.036
18	86.681	0.039	BDL	BDL	BDL	BDL	BDL	2.313	0.324	BDL	0.663	BDL	BDL	0.152	0.035	90.207
19	86.714	0.08	BDL	BDL	BDL	BDL	BDL	2.093	0.248	BDL	0.624	BDL	BDL	0.195	0.027	89.981
20	86.872	0.088	BDL	BDL	BDL	BDL	BDL	2.027	0.193	0.07	0.627	0.014	BDL	0.243	BDL	90.134
21	86.321	0.093	BDL	BDL	BDL	BDL	BDL	2.406	0.27	0.032	0.762	0.009	BDL	0.336	BDL	90.229
22	86.581	0.077	BDL	BDL	BDL	BDL	BDL	2.374	0.262	0.054	0.751	0.019	BDL	0.333	BDL	90.451
23	86.048	0.108	BDL	BDL	BDL	0.061	BDL	2.425	0.349	BDL	0.772	0.009	BDL	0.447	BDL	90.219
24	86.506	0.092	BDL	BDL	BDL	0.05	BDL	2.072	0.249	0.049	0.634	0.009	BDL	0.413	BDL	90.074
25	86.829	0.059	BDL	BDL	BDL	0.062	BDL	2.287	0.187	BDL	0.636	0.015	BDL	0.183	BDL	90.258
26	86.317	0.074	BDL	0.038	BDL	0.085	BDL	2.179	0.212	0.038	0.675	0.013	0.058	0.175	BDL	89.864
27	86.679	0.054	BDL	BDL	BDL	BDL	BDL	2.354	0.29	BDL	0.69	BDL	BDL	0.171	0.018	90.256
28	86.684	0.082	0.026	BDL	BDL	0.048	BDL	2.161	0.257	BDL	0.585	BDL	BDL	0.336	BDL	90.179
29	86.327	0.08	BDL	BDL	BDL	BDL	BDL	2.058	0.253	BDL	0.675	BDL	BDL	0.222	BDL	89.615
30	86.457	0.1	BDL	BDL	BDL	BDL	BDL	1.987	0.222	BDL	0.675	0.017	BDL	0.297	BDL	89.755
31	86.513	0.103	BDL	0.021	BDL	BDL	BDL	2.335	0.229	BDL	0.621	BDL	BDL	0.243	BDL	90.065
32	86.98	0.084	BDL	0.025	BDL	0.052	BDL	2.427	0.2	0.043	0.736	0.011	BDL	0.233	BDL	90.828
33	86.939	0.079	BDL	BDL	BDL	BDL	BDL	2.332	0.254	BDL	0.629	BDL	BDL	0.199	0.025	90.457
34	85.957	0.121	BDL	BDL	BDL	0.038	BDL	2.31	0.214	BDL	0.749	0.012	BDL	0.347	BDL	89.748
35	86.236	0.086	0.049	BDL	BDL	0.08	BDL	2.223	0.203	0.038	0.685	0.01	BDL	0.263	BDL	89.873
36	86.838	0.104	0.025	0.039	BDL	BDL	BDL	2.043	0.302	BDL	0.617	BDL	BDL	0.151	BDL	90.119
37	86.73	0.087	0.028	BDL	BDL	BDL	BDL	2.154	0.239	BDL	0.648	0.02	BDL	0.165	BDL	90.071
38	86.419	0.08	0.022	BDL	BDL	0.058	BDL	2.006	0.197	BDL	0.684	0.016	BDL	0.159	BDL	89.641
39	86.746	0.062	BDL	BDL	BDL	BDL	BDL	1.943	0.209	0.032	0.638	0.016	0.039	0.213	BDL	89.898
40	85.638	0.089	BDL	BDL	BDL	0.055	BDL	1.91	0.235	0.054	0.664	0.011	BDL	0.289	BDL	88.945
41	85.951	0.083	0.023	BDL	BDL	0.079	BDL	2.231	0.245	BDL	0.605	BDL	BDL	0.274	BDL	89.491
42	86.147	0.093	BDL	BDL	BDL	0.052	BDL	2.228	0.255	BDL	0.676	BDL	BDL	0.29	0.023	89.764
43	86.593	0.082	0.035	0.019	BDL	0.053	BDL	2.294	0.195	BDL	0.761	BDL	BDL	0.267	0.033	90.332
44	86.289	0.092	0.03	BDL	BDL	BDL	BDL	2.195	0.226	BDL	0.73	BDL	BDL	0.198	0.019	89.779
45	86.532	0.102	BDL	BDL	BDL	0.041	BDL	2.248	0.246	BDL	0.65	0.008	BDL	0.236	BDL	90.063
46	86.461	0.085	BDL	BDL	BDL	0.053	BDL	2.199	0.21	BDL	0.641	0.009	BDL	0.249	BDL	89.907
47	86.853	0.076	BDL	BDL	BDL	BDL	BDL	2.091	0.248	BDL	0.57	0.016	BDL	0.194	BDL	90.048
48	86.869	0.071	BDL	BDL	BDL	0.066	BDL	2.059	0.216	BDL	0.662	0.014	BDL	0.236	BDL	90.193
49	86.427	0.075	BDL	BDL	BDL	BDL	BDL	2.035	0.242	BDL	0.577	BDL	BDL	0.242	BDL	89.598
50	86.919	0.101	BDL	BDL	BDL	BDL	BDL	1.883	0.218	BDL	0.74	BDL	BDL	0.214	BDL	90.075
Average (1-25)	86.4798	0.07772	0.03	0.0266667		0.06525		2.31032	0.26124	0.0508	0.6604	0.0134167	0.039	0.229	0.0285	90.0688
Stdev (1-25)	0.29388	0.0213766		0.0085049		0.0197032		0.112424	0.0496322	0.0135904	0.0579842	0.00494439		0.0925077	0.00728697	0.242212
Average (26-50)	86.5	0.0858	0.02975	0.0284		0.0584615		2.1554	0.23268	0.041	0.66332	0.0133077	0.0485	0.23452	0.0236	89.9426
Stdev (26-50)	0.342761	0.0143846	0.00881152	0.00947629		0.014819		0.148356	0.0273126	0.00824621	0.0528494	0.00354459	0.013435	0.0528505	0.00598331	0.364285
Min	85.638	0.039	0.022	0.018	0	0.038	0	1.883	0.187	0.032	0.55	0.008	0.039	0.108	0.018	88.945
Max	86.98	0.126	0.049	0.039	0	0.105	0	2.437	0.349	0.07	0.772	0.023	0.058	0.447	0.038	90.828
Average (n=50)	86.4899	0.08176	0.0297778	0.02775		0.0610476		2.23286	0.24696	0.0459	0.66186	0.01336	0.0453333	0.23176	0.0262727	90.0057
Stdev (n=50)	0.316148	0.0184883	0.00824284	0.00853145		0.0167047		0.151965	0.04219	0.0117894	0.054927	0.0041821	0.0109697	0.0746148	0.00688609	0.312726
Notes: BDL means below detection limit. Analysis numbers from 1 to 25 and 26 to 50 represent results from two pieces of magneite, respectively

## Sheet: Table S2
Table S2 Statistical summary of LA-ICP-MS results of MtTR-1 that was used to represent the results of MtFe-1
	Na2O	MgO	Al2O3	SiO2	K2O	CaO	TiO2	MnO	V	Cr	Co	Ni	Cu	Zn	Ga	Ge	Rb	Sr	Zr	Mo	Ba	La	Ce	W	Bi	Pb
	wt%	wt%	wt%	wt%	wt%	wt%	wt%	wt%	µg g-1	µg g-1	µg g-1	µg g-1	µg g-1	µg g-1	µg g-1	µg g-1	µg g-1	µg g-1	µg g-1	µg g-1	µg g-1	µg g-1	µg g-1	µg g-1	µg g-1	µg g-1
Average (n=82)	0.013	0.67	0.279	2.374	0.026	0.26	0.047	0.081	149	40.5	63.5	159.6	34.7	59.9	10.5	1.82	1.13	6.21	1.81	1.27	8.39	1.28	2.09	1.97	32.1	1.29
stdev	0.001	0.034	0.021	0.039	0.002	0.032	0.003	0.004	1.8	4.3	0.9	5.3	2.2	3.7	0.4	0.17	0.07	0.44	0.56	0.28	0.62	0.1	0.12	0.17	1.8	0.11
Note: All data are from Huang et al. (2023) a
a X.-W. Huang, Y.-M. Meng, S. Lin and L. Qi, Atomic Spectroscopy, 2023, 44, 103-111.

## Sheet: Table S3
Table S3 In situ Fe isotope ratios for MtFe-1 using itself as bracketing standard
Analysis no.	δ56Fe	2SD	δ57Fe	2SD
1	-0.0112081	0.024445	-0.0310757	0.0504062
2	-0.0665471	0.0282616	-0.0413014	0.0550494
3	0.0630096	0.0262813	0.0731706	0.0545891
4	0.0227174	0.0245114	0.0388838	0.0558844
5	-0.023243	0.0235788	-0.0557047	0.0481583
6	0.00336356	0.0266641	-0.0160335	0.0534874
7	-0.0286414	0.0286745	-0.0195028	0.053633
8	0.0455239	0.0222045	0.107037	0.0476971
9	-0.0267541	0.0265516	-0.0751938	0.0519793
10	-0.0171112	0.0307016	-0.0482372	0.0562155
11	0.0311277	0.0259575	0.113545	0.0533201
12	-0.0548332	0.0233443	-0.146869	0.0466411
13	0.0945538	0.0283033	0.174234	0.0610284
14	-0.0516465	0.0255309	-0.103782	0.0521927
15	0.00295511	0.0212728	0.0118255	0.0520118
16	-0.0430552	0.027209	-0.0197416	0.0467127
17	0.0629952	0.0278292	-0.000774677	0.0501522
18	-0.0466393	0.0259668	0.024012	0.0561181
Average	-0.00241294	0.0932776	-0.000861566	0.160441

## Sheet: Table S4
Table S4 In situ Fe isotope ratios for MtFe-1 using IRMM-014 as bracketing standard
Analysis no.	δ56Fe	2SD	δ57Fe	2SD
1	-0.209583	0.0238461	-0.286987	0.0468533
2	-0.216155	0.0268877	-0.349009	0.049115
3	-0.170977	0.0260084	-0.32987	0.0508577
4	-0.210577	0.0243985	-0.312506	0.0482071
5	-0.163524	0.0243587	-0.234866	0.0529816
6	-0.146069	0.0219253	-0.182484	0.044098
7	-0.192651	0.024123	-0.319512	0.0484038
8	-0.188662	0.024128	-0.266948	0.0489796
9	-0.180636	0.0231298	-0.327818	0.046403
10	-0.153896	0.0224255	-0.272961	0.0452683
11	-0.164445	0.0221676	-0.289339	0.0432044
12	-0.204329	0.0259413	-0.252943	0.0475536
13	-0.120778	0.0211825	-0.200226	0.0490248
14	-0.188816	0.0309603	-0.25383	0.0454968
15	-0.204357	0.0231932	-0.24344	0.0485746
16	-0.0900519	0.0223155	-0.172569	0.0455806
17	-0.106187	0.0220818	-0.139329	0.0433154
18	-0.114955	0.0210365	-0.15552	0.043365
19	-0.146743	0.024075	-0.220878	0.0499493
20	-0.105235	0.0191398	-0.0688444	0.040531
Average	-0.16	0.08	-0.24	0.15
